# Supplementary material
Source: PubMed Central journal article supplement (PMC2330293)
Supplement: plntphys_pp.108.116137_2.pdf [file plntphys_pp.108.116137_2.pdf]

## Supplemental Figure 2

```

SNRK2.1 v1 MAAASTTNPDPPLASEGTFHKIKDLGSGSFGHVALYSRLGHDEPVAVKCLPVRVVDYDYNMVKREVRSHCSLNHPHVILFKRLGLTPDKRYLFMVMEYADCGD
SNRK2.1 v2 MAAASTTNPDPPLASEGTFHKIKDLGSGSFGHVALYSRLGHDEPVAVKCLPVRVVDYDYNMVKREVRSHCSLNHPHVILFKRLGLTPDKRYLFMVMEYADCGD
SNRK2.1 v3 MAAASTTNPDPPLASEGTFHKIKDLGSGSFGHVALYSRLGHDEPVAVKCLPVRVVDYDYNMVKREVRSHCSLNHPHVILFKRLGLTPDKRYLFMVMEYADCGD
SNRK2.1 v4 MAAASTTNPDPPLASEGTFHKIKDLGSGSFGHVALYSRLGHDEPVAVKCLPVRVVDYDYNMVKREVRSHCSLNHPHVILFKRLGLTPDKRYLFMVMEYADCGD
SNRK2.1 v5 MAAASTTNPDPPLASEGTFHKIKDLGSGSFGHVALYSRLGHDEPVAVKCLPVRVVDYDYNMVKREVRSHCSLNHPHVILFKRLGLTPDKRYLFMVMEYADCGD

SNRK2.1 v1 LFKYVQQHGRLPEADARWFFQQIILGLDYCHRRGVVNRDLKLENLLRSAAEVPPPPGQLEQPRNLHIKVADFGLCKASVNSLPKSRVGTLYYLAPEVLR
SNRK2.1 v2 LFKYVQQHGRLPEADARWFFQQIILGLDYCHRRGVVNRDLKLENLLRSAAEVPPPPGQLEQPRNLHIKVADFGLCKASVNSLPKSRVGTLYYLAPEVLR
SNRK2.1 v3 LFKYVQQHGRLPEADARWFFQQIILGLDYCHRRGVVNRDLKLENLLRSAAEVPPPPGQLEQPRNLHIKVADFGLCKASVNSLPKSRVGTLYYLAPEVLR
SNRK2.1 v4 LFKYVQQHGRLPEADARWFFQQIILGLDYCHRRGVVNRDLKLENLLRSAAEVPPPPGQLEQPRNLHIKVADFGLCKAAARRRA
SNRK2.1 v5 LFKYVQQHGRLPEADARWFFQQIILGLDYCHRRGVVNRDLKLENLRRRRGGRRHGGGRDGHDWVQRHR
                                                                ↓

SNRK2.1 v1 ASADRPYDAKLSDIWSVGVILYVLLFKAYPFGVISDRDNKAQRDAILRRIANAEWQLPAHPVIGEACRDLLSRILVSDPAKRITMEGIMSHSWFREDLPE
SNRK2.1 v2 ASADRPYDAKLSDIWSVGVILYVLLFKAYPFGVISDRDNKAQRDAILRRIANAEWQLPAHPVIGEACRDLLSRILVSDPAKRITMEGIMSHSWFREDLPE
SNRK2.1 v3 ASADRPYDAKLSDIWSVGVILYVLLFKAYPFGVISDRDNKAQRDAILRRIANAEWQLPAHPVIGEACRDLLSRILVSDP-----
SNRK2.1 v4
SNRK2.1 v5

                I                                     II
                ───────────────────────────────────────────────────────────────────────────────────────────────────

SNRK2.1 v1 GALEFNEGLVEEQAADPPRCEQSMEEIDAILSAAEDPLHGGLGAGLAGGGGAAGGGTAA GVMAMIGSSGIDDEIDELHAEHPSQFGMND
SNRK2.1 v2 GALEFNEGLVEEQAA----- GVMAMIGSSGIDDEIDELHAEHPSQFGMND
SNRK2.1 v3 -----AMIGSSGIDDEIDELHAEHPSQFGMND
SNRK2.1 v4
SNRK2.1 v5

```

**Supplemental Figure 1. Alignment of *SNRK2.1* splice versions.** The predicted *SNRK2.1* versions (v1 to v5) were aligned using BioEdit 7.0.5.3 software. The end of the kinase domain is denoted by an arrow. Subdomains I and II of the C-termini are indicated with a black line [Yoshida, 2006 #].
